# Supplementary material for: Experimental Study on Silt Soil Improved by Microbial Solidification with the Use of Lignin
Source: MDPI journal article supplement (doi:10.3390/microorganisms11020281), 2023-01-20
Supplement: s1 [file s1]

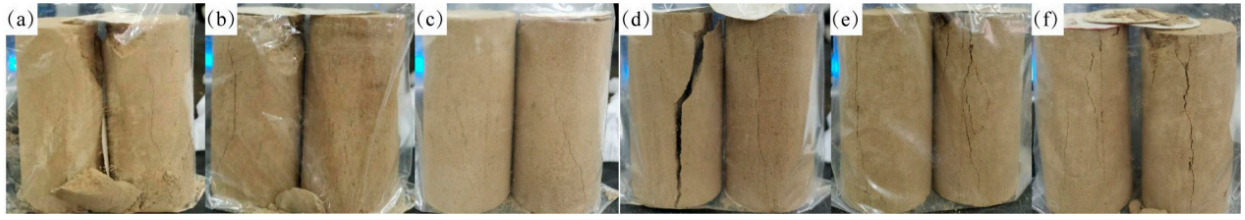

(A) The pressure failure diagram of the constant temperature sample for the M scheme.

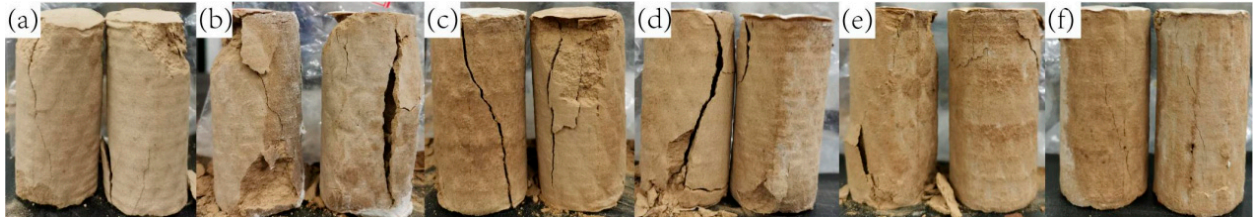

(B) The pressure failure diagram of the soaked sample for the M scheme.

**Figure S1.** The pressure failure diagram of different samples for the M scheme; (A) The pressure failure diagram of the constant temperature sample for the M scheme; (B) The pressure failure diagram of the soaked sample for the M scheme. The cement concentration of the sample from left to right is: (a) 0.5mol/L, (b) 0.75mol/L, (c) 1.0mol/L, (d) 1.25mol/L, (e) 1.5mol/L.

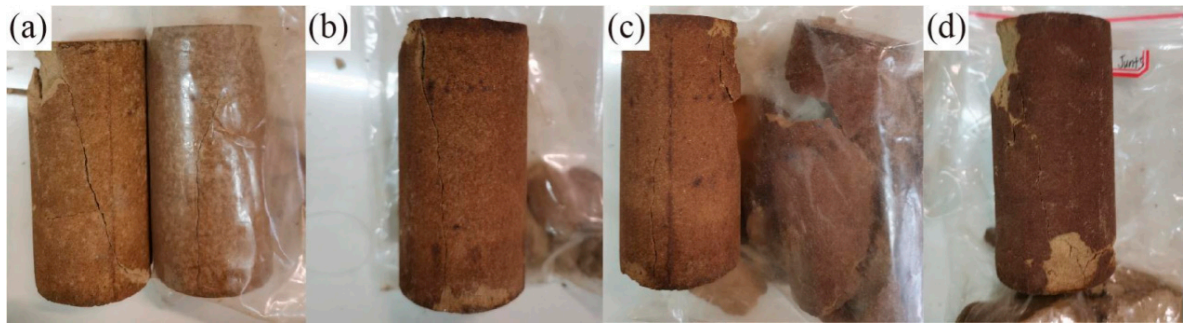

(A) The pressure failure diagram of the constant temperature sample in the M-L scheme.

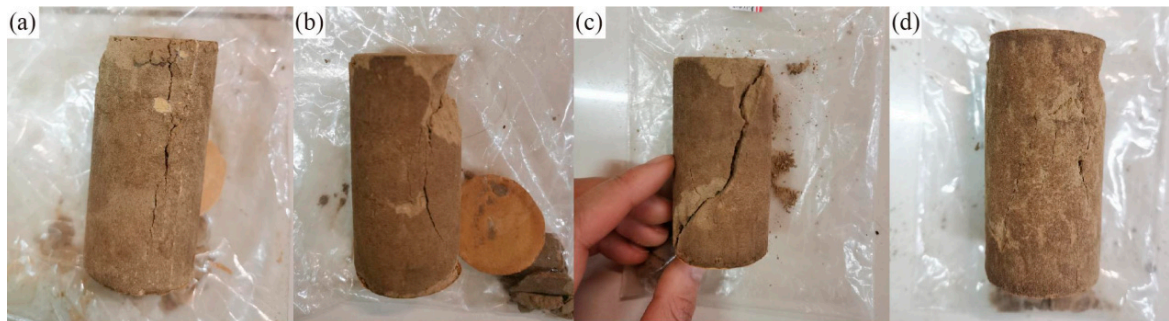

(B) Compression failure diagram of soaked sample in M-L scheme.

**Figure S2.** Compression failure diagram of different samples in M-L scheme; (A) The pressure failure diagram of the constant temperature sample in the M-L scheme; (B) Compression failure diagram of soaked sample in M-L scheme. From left to right, the lignin addition ratio of the sample is: (a) 1.5%, (b) 3%, (c) 4%, (d) 5%.

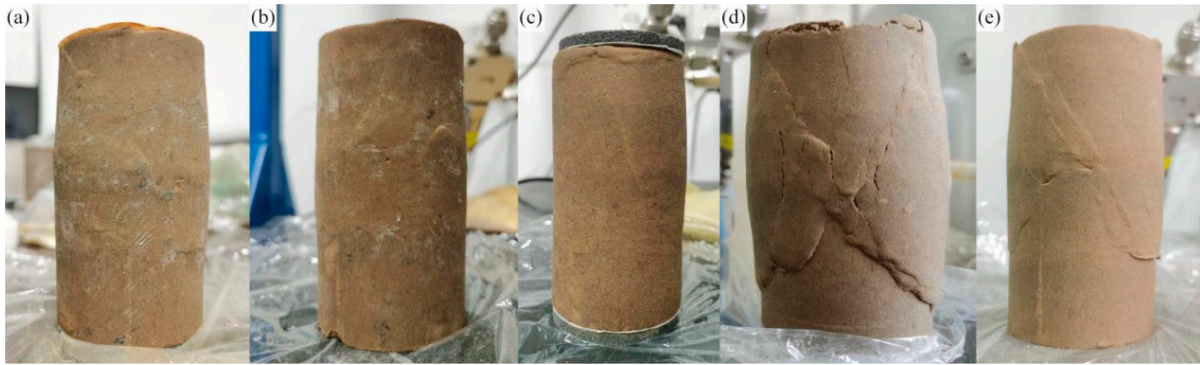

**Figure S3.** Failure diagram of M scheme specimen under dynamic load. The cement concentration of the sample from left to right is: (a)0.5mol/L, (b)0.75mol/L, (c)1.0mol/L, (d)1.25mol/L, (e)1.5mol/L.

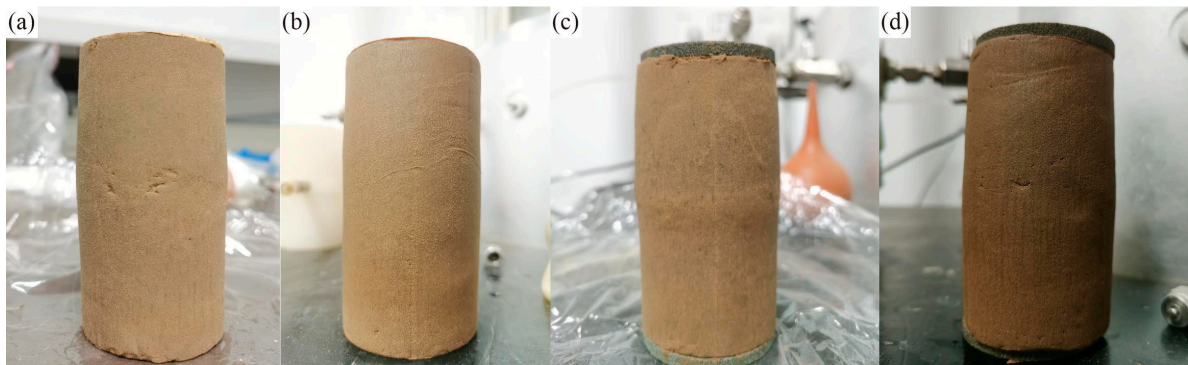

**Figure S4.** Failure diagram of M-L scheme specimen under dynamic load. From left to right, the lignin addition ratio of the sample is: (a)1.5%, (b)3%, (c)4%, (d)5%.

**Table S1.** Particle size ratio and coefficient.

| d60   | d50   | d30   | d10   | Cu   | Cc    |
|-------|-------|-------|-------|------|-------|
| 0.033 | 0.027 | 0.014 | 0.004 | 8.25 | 1.485 |

**Table S2.** The amount of each substance consumed in preparing a single sample.

|            | Bacterial liquid | Soil | cementing solution |
|------------|------------------|------|--------------------|
| Unlimited  | 48mL             | 160g | 48mL               |
| three-axis | 96mL             | 320g | 48mL               |

**Table S3.** Relationship between lignin addition ratio and  $F_{max}$ .

| The proportion of lignin added/% | 0    | 3      | 6       | 9       | 12    | 15    |
|----------------------------------|------|--------|---------|---------|-------|-------|
| $F_{max}/N$                      | 1017 | 2489.9 | 1401.65 | 1173.28 | 925.9 | 829.8 |
